# Supplementary material for: The Endochitinase of <em>Clonostachys Rosea</em> Enhances the Biocontrol Efficiency of <em>Bacillus Amyloliquefaciens</em> by Increasing Its Activities of Defense Enzymes
Source: Preprints.org preprint supplement (doi:10.20944/preprints201806.0306.v1), 2018-06-19
Supplement: Supplementary file 1 [file supplementary]

**Supplementary Table 1. PCR Primer sequences.**

| Gene          | Sequences (5' to 3')           |
|---------------|--------------------------------|
| ech42 forward | TATCTAGACGTGCCACTCCTCGTATGGAGG |
| ech42 reverse | CCCCCGGGGGAGAGGCTGTTCTTGAT     |

**Supplementary Table 2. Bacterial and fungal strains used in this study**

| Strain                            | Source                                                       |
|-----------------------------------|--------------------------------------------------------------|
| <i>Bacillus amyloliquefaciens</i> | Tomato Research Institute, Northeast Agricultural University |
| <i>Clonostachys rosea</i>         | Tomato Research Institute, Northeast Agricultural University |
| <i>E. coli</i> DH5 $\alpha$       | Tomato Research Institute, Northeast Agricultural University |
| <i>Botrytis cinerea</i>           | Tomato Research Institute, Northeast Agricultural University |
| <i>Colletotrichum coccodes</i>    | Tomato Research Institute, Northeast Agricultural University |
| <i>Pythium aphanidermatum</i>     | Tomato Research Institute, Northeast Agricultural University |
| <i>Sclerotinia sclerotiorum</i>   | Tomato Research Institute, Northeast Agricultural University |
| <i>Fusarium oxysporum</i>         | Tomato Research Institute, Northeast Agricultural University |
| <i>Fusarium verticillioide</i>    | Tomato Research Institute, Northeast Agricultural University |
